# Supplementary material for: pGluAβ increases accumulation of Aβ in vivo and exacerbates its toxicity
Source: PubMed Central journal article supplement (PMC5055666; doi:10.1186/s40478-016-0380-x), 2016-10-07

Fig S6

**A**

**EYE SCORING**

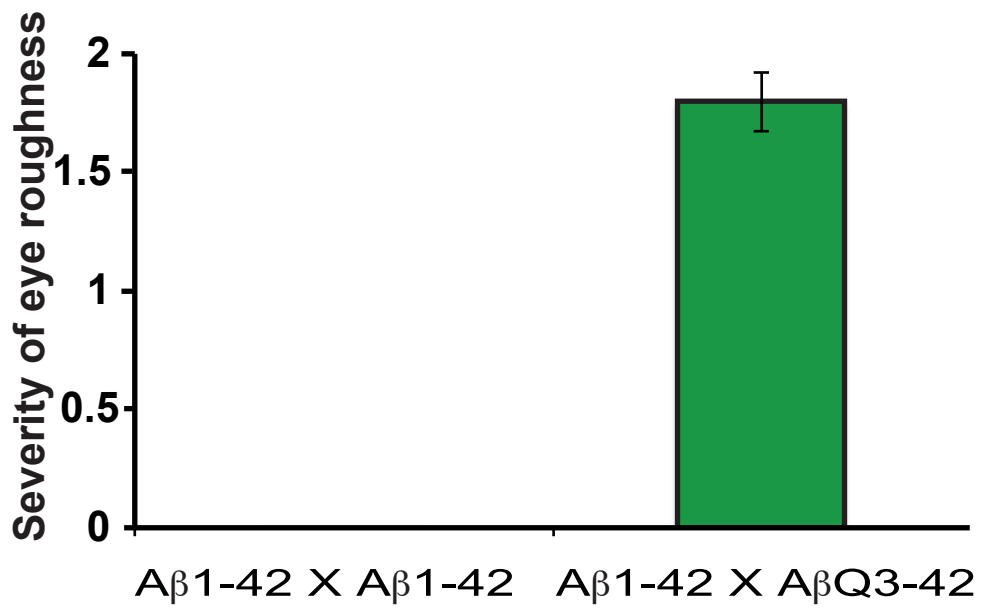

**B**

**EYE SCORING**

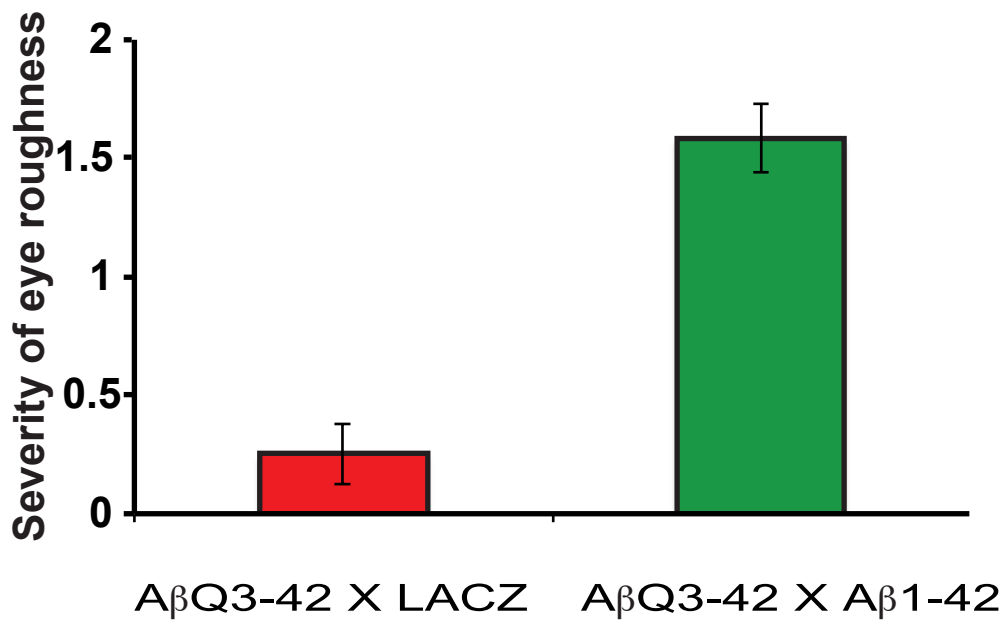

Supplement: 40478_2016_380_MOESM6_ESM.pdf [file 40478_2016_380_MOESM6_ESM.pdf]
